# Supplementary material for: DNA and RNA Alterations Associated with Colorectal Peritoneal Metastases: A Systematic Review
Source: MDPI journal article supplement (doi:10.3390/cancers15020549), 2023-01-16
Supplement: s1 [file s1]

**Supplementary Table S1.** Overview investigated genes with conclusions.

| Name gene                                       | Specification of Genetic Alteration Location | References              | Conclusions Formulated by the Authors                                    | Significantly Associated with PM? | Overall Conclusion Formulated by the Reviewers Based on Included Studies                                                                          |
|-------------------------------------------------|----------------------------------------------|-------------------------|--------------------------------------------------------------------------|-----------------------------------|---------------------------------------------------------------------------------------------------------------------------------------------------|
| <i>Androgen receptor (AR)</i>                   | Not specified                                | Lee et al. [30]         | <i>AR</i> mutation was detected more frequently in patients with PM.     | Yes                               | <i>AR</i> mutation can be associated with PM, but there is not enough evidence to formulate this conclusion. More research is necessary.          |
| <i>ASXL Transcriptional Regulator 1 (ASXL1)</i> | Not specified                                | Lee et al. [30]         | <i>ASXL1</i> mutation was detected more frequently in patients with PM.  | Yes                               | <i>ASXL1</i> mutation can be associated with PM, but there is not enough evidence to formulate this conclusion. More research is necessary.       |
| <i>AT-Rich Interaction Domain 1A (ARID1A)</i>   | Not specified                                | Lan et al. [29]         | No conclusion formulated.                                                | N/A                               | <i>ARID1A</i> mutation can be associated with PM, but there is not enough evidence to formulate this conclusion. More research is necessary.      |
|                                                 |                                              | Lee et al. [30]         | <i>ARID1A</i> mutation was detected more frequently in patients with PM. | Yes                               |                                                                                                                                                   |
| <i>Proto-oncogene B-Raf (BRAF)</i>              | Not specified                                | Atreya et al. [43]      | <i>BRAF</i> mutant tumors have more common PM, not significant.          | No                                | <i>BRAF</i> mutant tumors might be more likely to have PM, and mutations in <i>BRAF</i> might be higher for patients with PM compared to without. |
|                                                 |                                              | Lan et al. [29]         | No conclusion formulated.                                                | N/A                               |                                                                                                                                                   |
|                                                 |                                              | Prasanna et al. [45]    | <i>BRAF</i> mutant CRC showed higher incidence of PM.                    | Yes                               |                                                                                                                                                   |
|                                                 |                                              | Roberto et al. [46]     | <i>BRAF</i> mutant right-sided CRC was more likely to occur with PM.     | Yes                               |                                                                                                                                                   |
|                                                 |                                              | Tran et al. [48]        | <i>BRAF</i> mutant tumors had higher rates of PM.                        | Yes                               |                                                                                                                                                   |
|                                                 | Codon 600                                    | Christensen et al. [44] | <i>BRAF</i> mutations were not associated with the presence of PM.       | No                                |                                                                                                                                                   |
|                                                 |                                              | Kawazoe et al. [27]     | <i>BRAF</i> mutated tumors were more likely to develop PM.               | Yes                               |                                                                                                                                                   |

| Name gene                                 | Specification of Genetic Alteration Location | References              | Conclusions Formulated by the Authors                                                                                                               | Significantly Associated with PM? | Overall Conclusion Formulated by the Reviewers Based on Included Studies                                                                          |
|-------------------------------------------|----------------------------------------------|-------------------------|-----------------------------------------------------------------------------------------------------------------------------------------------------|-----------------------------------|---------------------------------------------------------------------------------------------------------------------------------------------------|
|                                           |                                              | Sasaki et al. [33]      | The PM group had a higher incidence of <i>BRAF</i> mutations.                                                                                       | Yes                               |                                                                                                                                                   |
|                                           |                                              | Shelygin et al. [35]    | No differences were observed between PM and no PM group.                                                                                            | No                                |                                                                                                                                                   |
|                                           |                                              | Taniguchi et al. [39]   | Mutations in <i>BRAF</i> were higher for patients with PM.                                                                                          | Yes                               |                                                                                                                                                   |
|                                           |                                              | Yokota et al. [40]      | <i>BRAF</i> -mutated tumors disseminate more often to the peritoneum.                                                                               | Yes                               |                                                                                                                                                   |
|                                           | Codon 600, exon 11 and 15                    | Bruzzi et al. [21]      | Trend for a higher rate of PM in <i>BRAF</i> mutant patients, not significant.                                                                      | No                                |                                                                                                                                                   |
|                                           | Codon 600, exon 15                           | Cheng et al. [22]       | Patients with <i>BRAF</i> V600E mutation had a higher frequency of PM.                                                                              | Yes                               |                                                                                                                                                   |
|                                           |                                              | Sayagués et al. [34]    | <i>BRAF</i> mutated tumors were associated with PM.                                                                                                 | Yes                               |                                                                                                                                                   |
|                                           |                                              | Yaeger et al. [49]      | PM was more common in <i>BRAF</i> mutant cases.                                                                                                     | Yes                               |                                                                                                                                                   |
|                                           | Codon 600 and 594                            | Smith et al. [37]       | A significant association between <i>BRAF</i> status and PM was found, although this association did not withstand correction for multiple testing. | No                                |                                                                                                                                                   |
|                                           | All exons                                    | He et al. [23]          | <i>BRAF</i> mutated tumors were more likely to develop PM (trend), not significant.                                                                 | No                                |                                                                                                                                                   |
| <i>Kinesin Family Member 18A (Kif18A)</i> | Not specified                                | Nagahara et al. [31]    | <i>Kif18A</i> overexpression in CRC correlates with PM.                                                                                             | Yes                               | <i>Kif18A</i> overexpression can be associated with PM, but there is not enough evidence to formulate this conclusion. More research is necessary |
| <i>RAS KRAS/NRAS</i>                      | Not specified                                | Christensen et al. [44] | No association.                                                                                                                                     | No                                |                                                                                                                                                   |

| Name gene   | Specification of Genetic Alteration Location | References              | Conclusions Formulated by the Authors                                                                                                                                     | Significantly Associated with PM? | Overall Conclusion Formulated by the Reviewers Based on Included Studies                                                                                     |
|-------------|----------------------------------------------|-------------------------|---------------------------------------------------------------------------------------------------------------------------------------------------------------------------|-----------------------------------|--------------------------------------------------------------------------------------------------------------------------------------------------------------|
|             | Exon 2, 3 and 4                              | Lan et al. [28]         | The proportion of PM was higher in patients whose tumors carried a RAS pathway mutation. Tumors with a <i>KRAS</i> mutation had a trend toward a higher proportion of PM. | Yes                               | There is not enough evidence that <i>KRAS/NRAS</i> mutant tumors are associated with a higher rate of PM. PM is not more seen in RAS pathway-mutated tumors. |
|             |                                              | Lan et al. [29]         | No conclusion formulated.                                                                                                                                                 | N/A                               |                                                                                                                                                              |
|             |                                              | Bruzzi et al. [21]      | No higher rate of PM in RAS mutant tumors.                                                                                                                                | No                                |                                                                                                                                                              |
|             |                                              | Sayagués et al. [34]    | No association between <i>KRAS/NRAS</i> mutation status and PM.                                                                                                           | No                                |                                                                                                                                                              |
|             |                                              | Kawazoe et al. [27]     | No differences for PM according to RAS mutation.                                                                                                                          | No                                |                                                                                                                                                              |
|             |                                              | Smith et al. [37]       | No association between <i>KRAS/NRAS</i> mutation status and PM.                                                                                                           | No                                |                                                                                                                                                              |
|             |                                              | Christensen et al. [44] | No association.                                                                                                                                                           | No                                |                                                                                                                                                              |
|             |                                              | Lan et al. [28]         | The proportion of PM was higher in patients whose tumors carried a RAS pathway mutation. Tumors with a <i>KRAS</i> mutation had a trend toward a higher proportion of PM. | Yes                               |                                                                                                                                                              |
| <i>KRAS</i> | <i>Not specified</i>                         | Lan et al. [29]         | No conclusion formulated.                                                                                                                                                 | N/A                               |                                                                                                                                                              |
|             |                                              | Sasaki et al. [33]      | No association between <i>KRAS</i> mutation status and PM.                                                                                                                | No                                |                                                                                                                                                              |
|             |                                              | Yokota et al. [40]      | No association.                                                                                                                                                           | No                                |                                                                                                                                                              |
|             | Codon 12, 13                                 |                         |                                                                                                                                                                           |                                   |                                                                                                                                                              |
|             | Codon 12, 13 and 61                          |                         |                                                                                                                                                                           |                                   |                                                                                                                                                              |

| Name gene                                                       | Specification of Genetic Alteration Location                 | References              | Conclusions Formulated by the Authors                                                                                                                                 | Significantly Associated with PM? | Overall Conclusion Formulated by the Reviewers Based on Included Studies                                                                      |
|-----------------------------------------------------------------|--------------------------------------------------------------|-------------------------|-----------------------------------------------------------------------------------------------------------------------------------------------------------------------|-----------------------------------|-----------------------------------------------------------------------------------------------------------------------------------------------|
|                                                                 | Codon 12/13 exon 2, Codon 59/61 exon 3, Codon 117/146 exon 4 | Zihui Yong et al. [51]  | PM was associated with <i>KRAS</i> mutant tumors.                                                                                                                     | Yes                               |                                                                                                                                               |
|                                                                 | All exons                                                    | He t al. [23]           | Mutant <i>KRAS</i> tumors have a relevance with PM. <i>KRAS</i> codon 12 mutation is associated with PM and patients with PM tent to carry a mutant <i>KRAS</i> G12D. | Yes                               |                                                                                                                                               |
| <i>NIMA Related Kinase 2 (NEK2)</i>                             | Not specified                                                | Takahashi et al. [38]   | High <i>NEK2</i> expression shows greater PM.                                                                                                                         | Yes                               | <i>NEK2</i> expression can be associated with PM, but there is not enough evidence to formulate this conclusion. More research is necessary.  |
| <i>MET Transcriptional Regulator MACC1 (MACC1)</i>              | Not specified                                                | Shirahata et al. [42]   | High <i>MACC1</i> expression shows correlation with PM.                                                                                                               | Yes                               | <i>MACC1</i> expression can be associated with PM, but there is not enough evidence to formulate this conclusion. More research is necessary. |
| <i>Paired Box 5 (PAX5)</i>                                      | Not specified                                                | Lee et al. [30]         | <i>PAX5</i> mutation was detected more frequently in patients with PM.                                                                                                | Yes                               | <i>PAX5</i> mutation can be associated with PM, but there is not enough evidence to formulate this conclusion. More research is necessary.    |
| <i>phosphatidylinositol-4,5-bisphosphate 3-kinase catalytic</i> | Not specified                                                | Christensen et al. [44] | <i>PIK3CA</i> mutation was associated with absence of PM and a decreased hazard of developing PM.                                                                     | No                                | <i>PIK3CA</i> mutation is not associated with PM, and the presence of a mutation is                                                           |

| Name gene                                                                 | Specification of Genetic Alteration Location | References            | Conclusions Formulated by the Authors                                   | Significantly Associated with PM? | Overall Conclusion Formulated by the Reviewers Based on Included Studies                                                                      |
|---------------------------------------------------------------------------|----------------------------------------------|-----------------------|-------------------------------------------------------------------------|-----------------------------------|-----------------------------------------------------------------------------------------------------------------------------------------------|
| <i>subunit alpha (PIK3CA)</i>                                             |                                              | Lan et al. [28]       | No association between PM and presence of PI3K pathway mutation.        | No                                | possibly associated with a decreased change of developing PM.                                                                                 |
|                                                                           |                                              | Lan et al. [29]       | No conclusion formulated.                                               | N/A                               |                                                                                                                                               |
|                                                                           |                                              | Smith et al. [37]     | No differences were observed between PM and no PM group.                | No                                |                                                                                                                                               |
|                                                                           |                                              | Sasaki et al. [33]    | No differences were observed between PM and no PM group.                | No                                |                                                                                                                                               |
|                                                                           |                                              | Shelygin et al. [35]  | No differences were observed between PM and no PM group.                | No                                |                                                                                                                                               |
|                                                                           |                                              | Taniguchi et al. [39] | No conclusion formulated.                                               | N/A                               |                                                                                                                                               |
| <i>PKHD1 Ciliary IPT Domain Containing Fibrocystin/Polyductin (PKHD1)</i> | Not specified                                | Lee et al. [30]       | <i>PKHD1</i> mutation was detected more frequently in patients with PM. | Yes                               | <i>PKHD1</i> mutation can be associated with PM, but there is not enough evidence to formulate this conclusion. More research is necessary.   |
| <i>Regenerating Family Member 1 Alpha (REG1A)</i>                         | Not specified                                | Astrosini et al. [20] | <i>REG1A</i> expression levels highly correlated with formation of PM.  | Yes                               | <i>REG1A</i> expression can be associated with PM, but there is not enough evidence to formulate this conclusion. More research is necessary. |
| <i>Ret Proto-Oncogene (RET)</i>                                           | Not specified                                | Yang et al. [50]      | The presence of <i>RET</i> mutations was associated with PM.            | Yes                               | <i>RET</i> mutation can be associated with PM, but there is not enough evidence to formulate this conclusion. More research is necessary.     |
| <i>Histone acetyltransferase (Tip60)</i>                                  | Not specified                                | Sakuraba et al. [32]  | Downregulation of <i>Tip60</i> shows correlation with PM.               | Yes                               | <i>Tip60</i> downregulation can be associated with PM, but there is not enough evidence                                                       |

| Name gene                                                        | Specification of Genetic Alteration Location | References            | Conclusions Formulated by the Authors                                             | Significantly Associated with PM? | Overall Conclusion Formulated by the Reviewers Based on Included Studies                                                                       |
|------------------------------------------------------------------|----------------------------------------------|-----------------------|-----------------------------------------------------------------------------------|-----------------------------------|------------------------------------------------------------------------------------------------------------------------------------------------|
|                                                                  |                                              |                       |                                                                                   |                                   | to formulate this conclusion. More research is necessary.                                                                                      |
| <i>Tumor protein P53 (TP53)</i>                                  | Not specified                                | Lan et al. [29]       | For patients with PM, the frequency of mutations was the highest in <i>TP53</i> . | No                                | <i>TP53</i> mutations are possibly detected more frequently in patients with PM, but further research is necessary to identify the association |
|                                                                  |                                              | Lee et al. [30]       | <i>TP53</i> mutation was detected more frequently in patients with PM.            | Yes                               |                                                                                                                                                |
|                                                                  |                                              | Sayagués et al. [34]  | No associations were found between <i>TP53</i> mutation and PM.                   | No                                |                                                                                                                                                |
|                                                                  |                                              | Sjo et al. [36]       | PM was associated with mutations in <i>TP53</i> .                                 | Yes                               |                                                                                                                                                |
| <i>Ubiquitin Protein Ligase E3 Component N-Recognin 5 (UBR5)</i> | Not specified                                | Lee et al. [30]       | <i>UBR5</i> mutation was detected more frequently in patients with PM.            | Yes                               | <i>UBR5</i> mutation can be associated with PM, but there is not enough evidence to formulate this conclusion. More research is necessary.     |
| Vimentin                                                         | Not specified                                | Shirahata et al. [41] | There is a trend toward developing PM and vimentin methylation, not significant.  | No                                | Vimentin methylation can be possibly associated with PM, but further research is necessary.                                                    |

CRC, colorectal cancer; PM, peritoneal metastases.
